# Supplementary material for: Loss of Tbx3 in Mouse Eye Causes Retinal Angiogenesis Defects Reminiscent of Human Disease
Source: PubMed Central journal article supplement — Invest Ophthalmol Vis Sci. 2023 May 1;64(5):1. doi: 10.1167/iovs.64.5.1 (PMC10155871; doi:10.1167/iovs.64.5.1), 2023-05-01
Supplement: iovs-64-5-1_s001.pdf [file iovs-64-5-1_s001.pdf]

**Figure S1**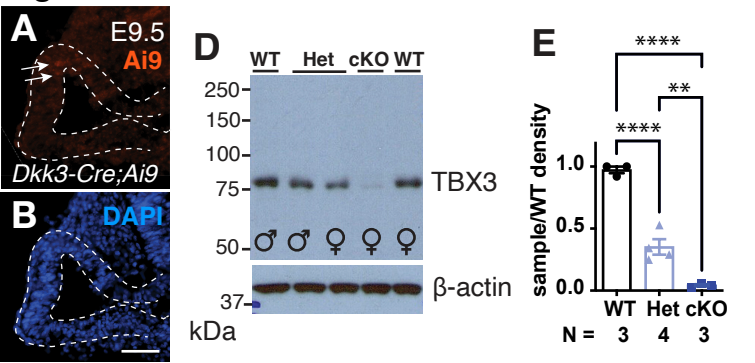

**Supplemental Figure S1. The optic cup-expressing Cre driver, *BAC-Dkk3-CRE*, removes *Tbx3* from the retina and optic stalk.**

(A,B) *BAC-Dkk3-CRE* expression pattern is detected using Ai9 reporter line expressing tdTomato. Cre activity is first detectable in the optic vesicle (dashed lines) at E9.5 (arrows). (C-C'') At E13.5, the only structures expressing tdTomato (red) are the neural retina, overlying ectoderm and optic stalk (OS). The red channel was enhanced to show that cells between the neural retina and lens were not stained (arrow). (D,E) Western blot of P0 retinas collected from wild-type (WT, *Tbx3*<sup>Fl/+</sup>), heterozygous (Het, *BAC-Dkk3-CRE;Tbx3*<sup>ΔFl/+</sup>), and homozygous knockout (cKO, *BAC-Dkk3-CRE;Tbx3*<sup>ΔFl/ΔFl</sup>) siblings. Graph shows mean  $\pm$  s.e.m. of 2 litters. No statistical differences in *Tbx3* expression were observed in males and females. Ordinary one-way ANOVA test with multiple comparisons was used to determine statistical significance. \*\*\*\*,  $p=0.00005$ ; \*\*,  $p\leq 0.01$ .

(F-F'') At P20, a close-up of a blood vessel (arrow) stained with an antibody against alpha-smooth muscle actin (SMA) and blood vessel marker, CD31, shows a lack of tdTomato. Surrounding cells are expressing the Cre reporter. (G-G'') Another transgenic line expressing Cre under the control of *Tie2* has overlapping expression with blood vessel markers, SMA and CD31.

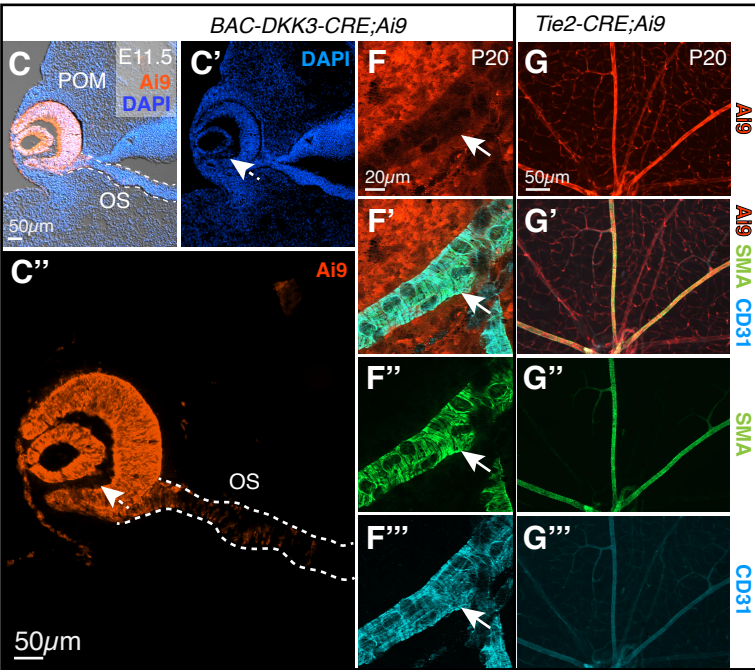

**Figure S2**

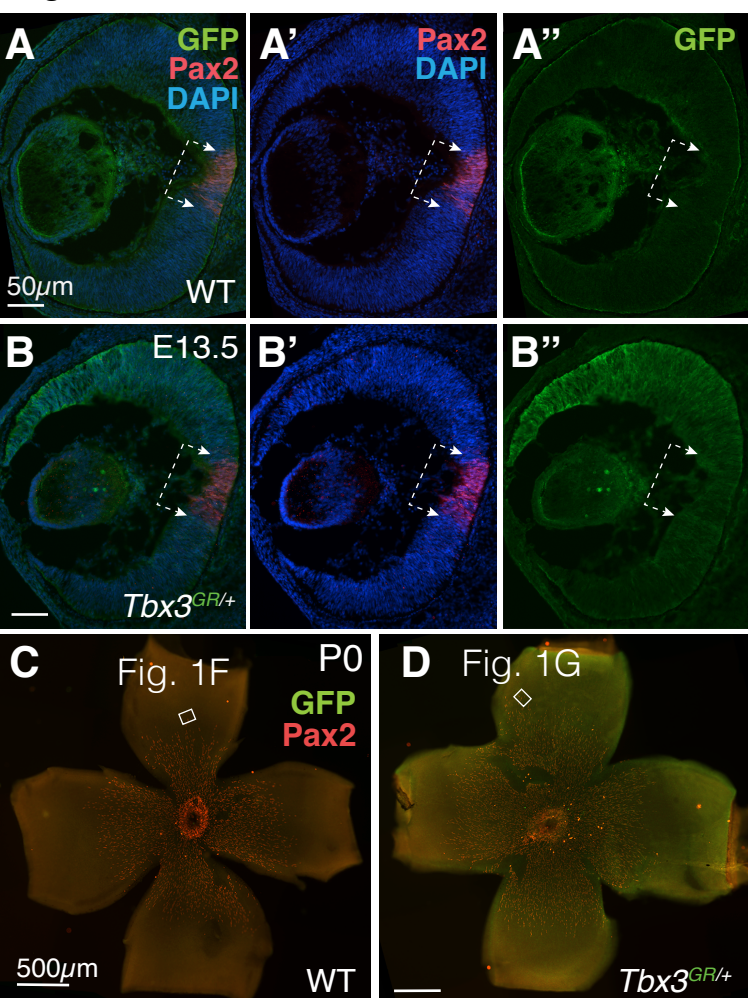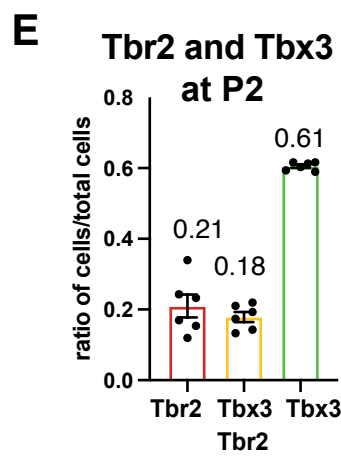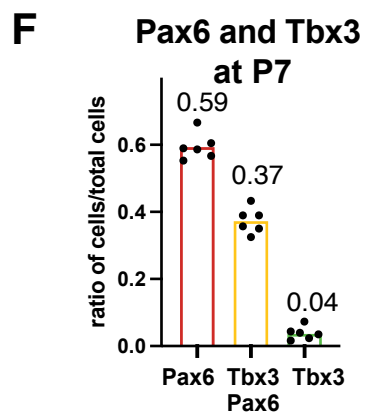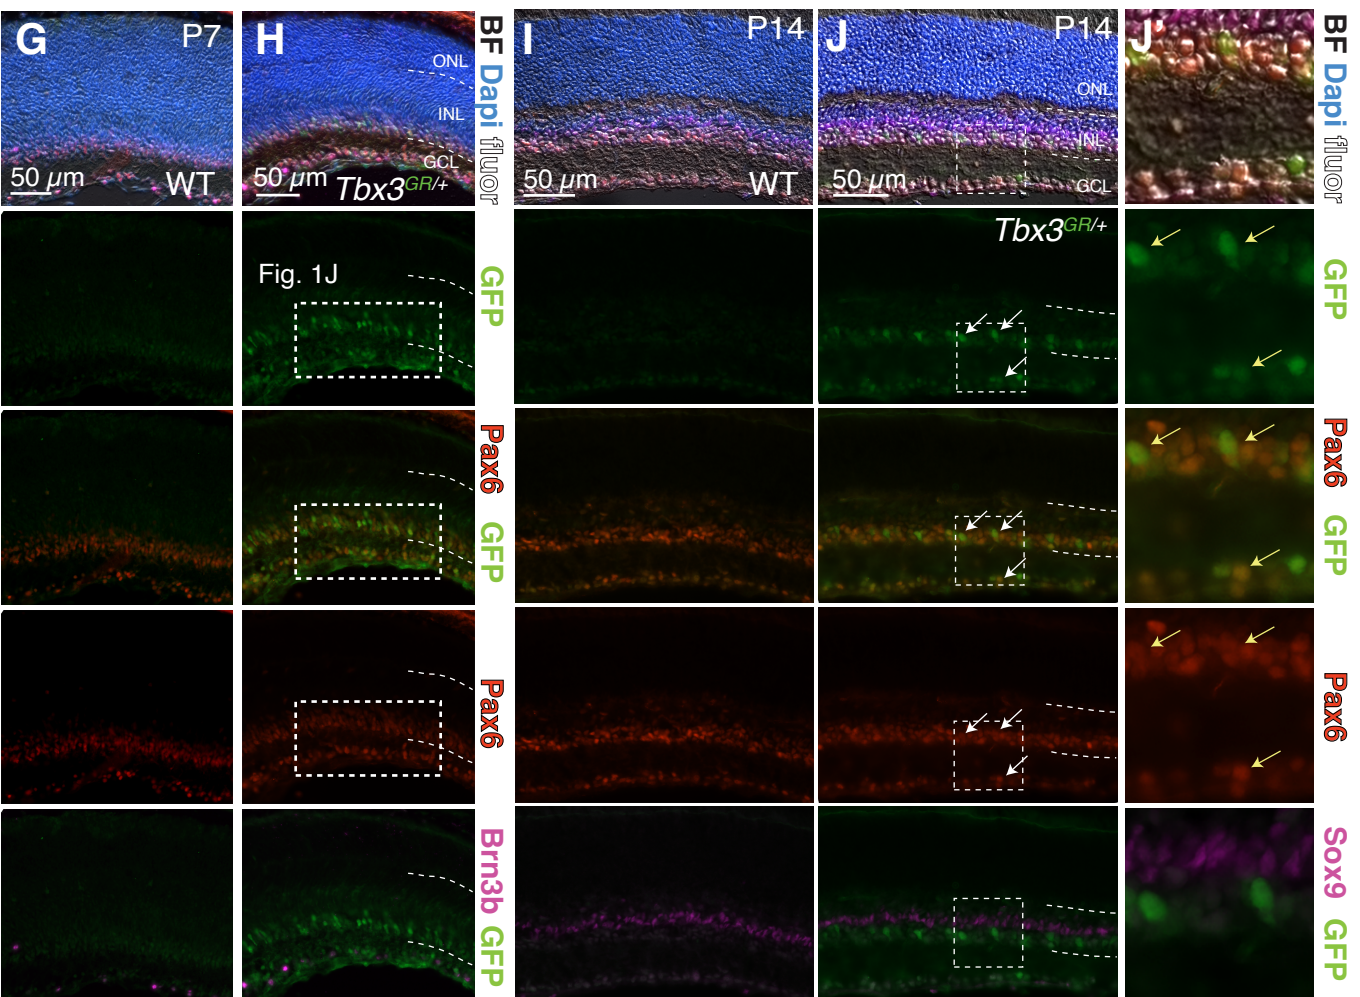

**Supplemental Figure S2. Tbx3 is expressed in embryonic neural retinal progenitors, Pax2-positive embryonic and perinatal astrocyte precursors, retinal ganglion and amacrine cells.**

(A-B'') Embryonic retinal sections from sibling WT and Tbx3-GFP knock-in mice (Tbx3<sup>GR/+</sup>) immunostained with anti-GFP (green) and Pax2 (red) antibodies (bracket marks Pax2-positive cells). DAPI labels nuclei. Scale bars indicate 50  $\mu$ m. (C,D) Flat mounts from sibling P0 WT and Tbx3<sup>GR/+</sup> immunostained with anti-GFP (green) and Pax2 (red) antibodies. Images were taken and enhanced using the same conditions. Box marks region imaged by the confocal microscope in Figs. 1I and 1J. Dorsal (D) is up in panels A-D. (E,F) Quantitation of cells counted in six regions of central retinal sections at P2 (Tbr2/GFP) and P7 (Pax6/GFP) in three Tbx3-GFP mice at each age. The average ratio of the indicated marked cells labels each bar. (G-H) Representative image of a P7 WT (G) and Tbx3<sup>GR/+</sup> (H) retina immunostained with anti-Pax6 and Brn3b antibodies. Boxed area indicates the region amplified in Fig. 1J. (I-J') Representative image of a P4 WT (I) and Tbx3<sup>GR/+</sup> (J) retina immunostained with anti-Pax6 and Sox9 antibodies. Boxed area in J indicates the region amplified for panels in J'. Arrows point to double labeled cells (Pax6/GFP).

## Figure S3

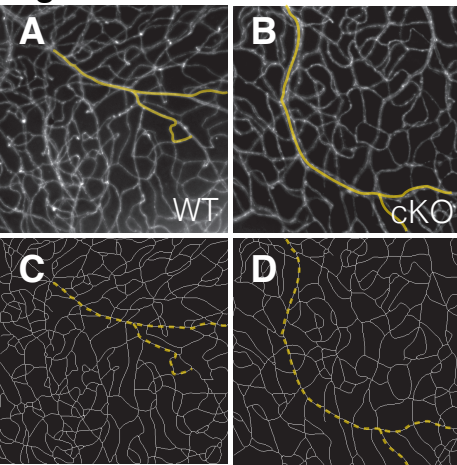

**Supplemental Figure S3. Example images of how branch points and density were calculated.**

(A,B) Flat mount retinas of CD31-positive dorsal retinal vasculature in WT and Tbx3 cKO mice; images were processed using ImageJ and (C,D) transformed into skeletonized versions of the corresponding images. The skeletonized images from WT ( $n = 3$ ) and cKO ( $n = 3$ ) were used for analysis. Yellow and dashed lines trace the same vessels in A and C, B and D.

**Figure S4**

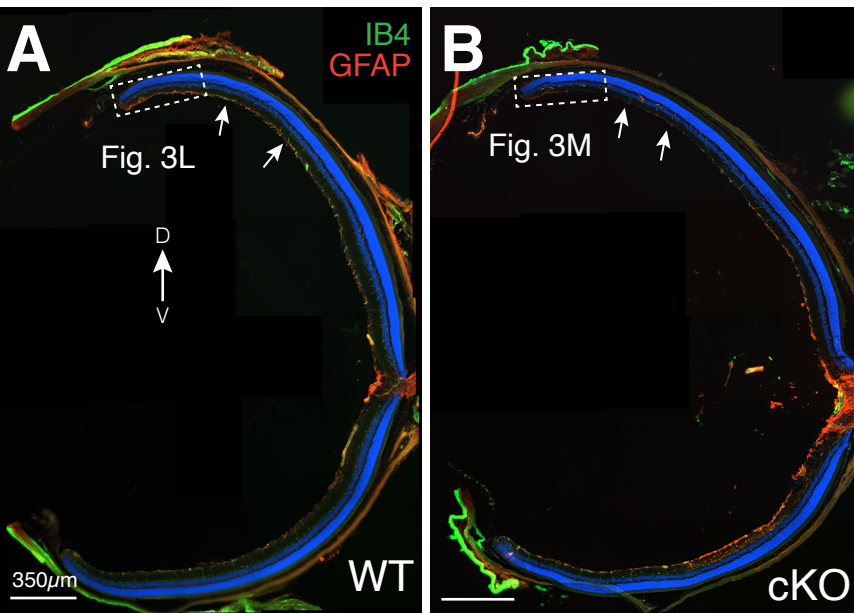

**Supplemental Figure S4. Blood vessel and astrocyte lattice formation are perturbed in P26 conditional knockout mice.**

A,B) Transverse sections (20 $\mu$ m) of P26 eyes through the optic nerve shows the regions taken to make Fig. 3 (dashed box). Blood vessels were stained with IB4 (green); astrocytes and Müller glia were stained with anti-GFAP antibody (red). Dorsal is up. Note the astrocytes in the dorsal inner limiting membrane in the wild-type (A, arrows), but much fewer in the cKO (B).

## Supplemental Tables

**Supplemental Table S1. PCR primers and conditions for PCR reactions**

| Target                   | Primer name        | 5'→3' Sequence              | PCR conditions |                  |                         |              |                         |             |
|--------------------------|--------------------|-----------------------------|----------------|------------------|-------------------------|--------------|-------------------------|-------------|
|                          |                    |                             | Step 1         | Step 2           | Step 3                  | Step 4       | Step 5                  | Step 6      |
| <b>Tbx3-flox</b>         | Tbx3 Geno01        | AAGTCATGGAGCTCGTATCGCG      | 94° C 2 min    | 94° C 20 sec     | Repeat<br>Step 2<br>35X | 72° C 5 min  |                         |             |
|                          | Tbx3 Geno02        | GTGTGAGACAGAGAAATCAGTGG     |                | 55° C 20 sec     |                         |              |                         |             |
|                          | Tbx3 Geno03        | CCAAC TGGTATCTTGATAAACCTC   |                | 72° C 20 sec     |                         |              |                         |             |
| <b>CRE</b>               | 5' CreR 368        | AAAACGTTGATGCCGGTGAA        | 94° C 2 min    | 94° C 15 sec     | Repeat<br>Step 2<br>37X | 72° C 5 min  |                         |             |
|                          | 3' CreR 922        | CCGGTATTGAAACTCCAGCG        |                | 60° C 15 sec     |                         |              |                         |             |
|                          |                    |                             |                | 72° C 30 sec     |                         |              |                         |             |
| <b>Sex</b>               | SX_F               | GATGATTTGAGTGGAAATGTGAGGTA  | 94° C 3 min    | 94° C 20 sec     | Repeat<br>Step 2<br>35X | 72° C 5 min  |                         |             |
|                          | SX_R               | CTTATGTTTATAGGCATGCACCATGTA |                | 57° C 20 sec     |                         |              |                         |             |
|                          |                    |                             |                | 72° C 20 sec     |                         |              |                         |             |
| <b>Tbx3<sup>GR</sup></b> | SH65A Tbx3-G       | CATACGTGTATATGATGGGAGGTTG   | 94° C 2 min    | 94° C 20 sec     | Repeat<br>Step 2<br>10X | 94° C 15 sec | Repeat<br>Step 4<br>28X | 72° C 2 min |
|                          | SH57A Tbx3-G       | GCAATCTATACATGTCTCGGAG      |                | 65-0.5° C 15 sec |                         | 60° C 15 sec |                         |             |
|                          |                    |                             |                | 68° C 10 sec     |                         | 72° C 10 sec |                         |             |
| <b>Ai9</b>               | 5 Ai9WT oIMR9020   | AAGGGAGCTGCAGTGGAGTA        | 94° C 2 min    | 94° C 20 sec     | Repeat<br>Step 2<br>10X | 94° C 15 sec | Repeat<br>Step 4<br>28X | 72° C 2 min |
|                          | 3 Ai9 WT oIMR9021  | CCGAAAATCTGTGGGAAGTC        |                | 65-0.5° C 15 sec |                         | 60° C 15 sec |                         |             |
|                          | 5 Ai9WPRE oIMR9103 | GGCATTAAAGCAGCGTATCC        |                | 68° C 10 sec     |                         | 72° C 10 sec |                         |             |
|                          | 3 Ai9 oIMR9105     | CTGTTCTGTACGGCATGG          |                |                  |                         |              |                         |             |

**Supplemental Table S2. Antibodies and conditions used for immunostaining.**

|                                                    | Species raised             | Company                              | Catalog #                        | Lot #           | Block conditions                         | 1° Antibody concentration | 2° Ab Co. & cat#       | Antibody ID             | (PMID)                           |
|----------------------------------------------------|----------------------------|--------------------------------------|----------------------------------|-----------------|------------------------------------------|---------------------------|------------------------|-------------------------|----------------------------------|
| <b>GFP</b>                                         | Chicken                    | AbCam                                | AB13970                          | GR89472-2<br>2  | 1X PBS, 10% HIGS,<br>0.3% Triton         | 1:1500                    | AbCam<br>AB150169      | AB_300798               | 33774011                         |
| <b>Pax2</b>                                        | Rabbit                     | Biologend                            | 901002<br>(Covance#<br>PRB-276P) | B287354         | 1X PBS, 10% HIGS,<br>0.3% Triton         | 1:1000                    | Invitrogen<br>A21428   | AB_2565001<br>AB_291611 | 19505455<br>33428890             |
| <b>Pax6</b>                                        | Mouse                      | DSHB                                 | Pax6                             | n/a             | 1X PBS, 10% HIGS,<br>0.5% Triton         | 1:50                      | Invitrogen<br>A31570   | AB_528427               | 12648492<br>18626943             |
| <b>Tbr2</b>                                        | Rabbit                     | AbCam                                | AB23345                          | GR3378360<br>-1 | 1X PBS, 10% HIGS,<br>0.5% Triton         | 1:1000                    | Invitrogen<br>A31572   | AB_778267               | 28078709<br>27565344             |
| <b>Sox9</b>                                        | Rabbit                     | Millipore                            | AB5535                           | 3892468         | 1X PBS, 5% HIGS,<br>0.3% Triton          | 1:4000                    | AbCam<br>AB150079      | AB_2239761              | 18626943<br>33960384             |
| <b>Brn3b</b>                                       | Goat                       | Santa Cruz                           | SC-6026                          | D1012           | 1X PBS, 10% HIGS,<br>0.5% Triton         | 1:250                     | Invitrogen<br>A34849   | AB_673441               | 21935940<br>27957530             |
| <b>GFAP</b>                                        | Mouse                      | Sigma                                | G3893                            | 122914          | 1X PBS, 5% HIGS,<br>0.3% Triton          | 1:500                     | Invitrogen<br>A21424   | AB_477010               | 6198232<br>26996101              |
| <b>PDGFR<math>\alpha</math></b><br><b>(CD140a)</b> | Rat                        | BD<br>Biosciences                    | 558774                           | 8109820         | 1X PBS, 5% HIGS,<br>5% HIDS, 0.3% Triton | 1:500                     | Jackson<br>112-605-167 | AB_397117               | 28943241<br>8982160<br>8875964   |
| <b>OPN4</b>                                        | Rabbit                     | Advanced<br>Targeting<br>Systems Bio | AB-N38<br>(clone<br>UF006)       | 135-4           | 1X PBS, 5% HIGS,<br>5% HIDS, 0.3% Triton | 1:2500                    | Invitrogen<br>A31572   | AB_1608077              | 20503419<br>11823848<br>11834834 |
| <b>Islet1/2</b>                                    | Mouse                      | DSHB                                 | 39.4D5                           | n/a             | 1X PBS, 10% HIDS,<br>0.3% Triton         | 1:100                     | Invitrogen<br>A31570   | AB_2314683              | 1350865<br>31313880              |
| <b>CD31</b>                                        | Rat                        | BD<br>Biosciences                    | 550274<br>(clone<br>MEC13.3)     | 8079850         | 1X PBS, 5% HIGS,<br>0.1% Triton          | 1:250                     | Invitrogen<br>A11077   | AB_393571               | 9284815<br>7956830               |
| <b>IB4-FITC</b>                                    | Griffonia<br>simplicifolia | Sigma                                | L2895                            | 125M4177V       | 1X PBS, 5% HIGS,<br>0.3% Triton          | 1:50                      | -                      | -                       | 7107706<br>29511172              |
| <b><math>\alpha</math>SMA-FITC</b>                 | Mouse                      | Sigma                                | F3777<br>(Clone 1A4)             | n/a             | 1X PBS, 5% HIGS,<br>0.3% Triton          | 1:500                     | -                      | -                       | 29874128                         |
